# Supplementary material
Source: PubMed Central journal article supplement (PMC6941143)

## SUPPLEMENTAL MATERIAL

**Supplemental Table 1. Comparison of LV thrombus characteristics between those detected by echocardiography (n = 53) vs. not (n = 57)**

|                                                   | <b>Detected by echocardiography</b> | <b>Not detected by echocardiography</b> | <b>P value</b>   |
|---------------------------------------------------|-------------------------------------|-----------------------------------------|------------------|
| Time between echocardiography and CMR, days (IQR) | 2 (1, 3)                            | 2 (1, 4)                                | 0.32             |
| Echocardiography contrast used, %                 | 38 (71.7)                           | 32 (56.1)                               | 0.09             |
| >1 thrombus, %                                    | 9 (17.0)                            | 14 (24.6)                               | 0.33             |
| Apical location, %                                | 51 (96.2)                           | 50 (87.7)                               | 0.11             |
| Protuberant, %                                    | 44 (83.0)                           | 30 (52.6)                               | <b>&lt;0.001</b> |
| Volume, cm <sup>3</sup> (IQR)                     | 2.6 (1.6 – 6.1)                     | 1.5 (1.0 – 4.2)                         | <b>0.015</b>     |
| Mobile, %                                         | 14 (26.4)                           | 3 (5.3)                                 | <b>0.002</b>     |
| Additional intracardiac thrombi, %                | 11 (20.8)                           | 8 (14.0)                                | 0.35             |

**Supplemental Figure 1. Incidence of embolism in patients with protuberant LV thrombus compared with those with mural LV thrombus.** Kaplan-Meier curves demonstrate the cumulative incidence of the composite embolic endpoint in patients with protuberant LV thrombus (in red) and in patients with mural LV thrombus (in blue). Note the lack of a significant difference in the cumulative incidence of embolic events between the two groups.

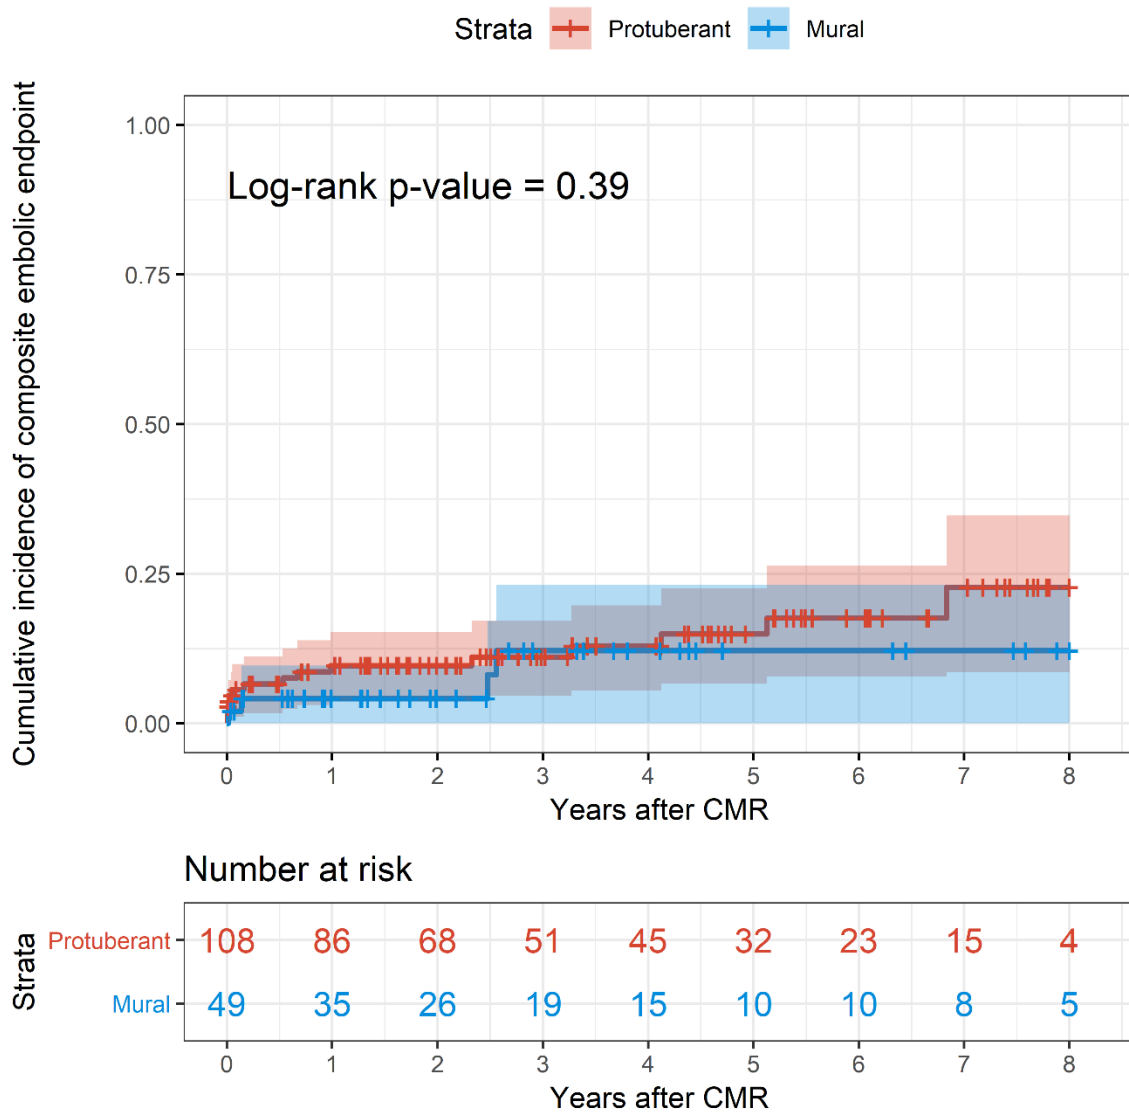

**Supplemental Figure 2. Incidence of embolism in patients with LV thrombus  $\geq$  median in volume compared with those with LV thrombus  $<$  median in volume.**

Kaplan-Meier curves demonstrate the cumulative incidence of the composite embolic endpoint in patients with LV thrombus  $\geq$  median in volume (in red) and in patients with LV thrombus  $<$  median in volume (in blue). Note the lack of a significant difference in the cumulative incidence of embolic events between the two groups.

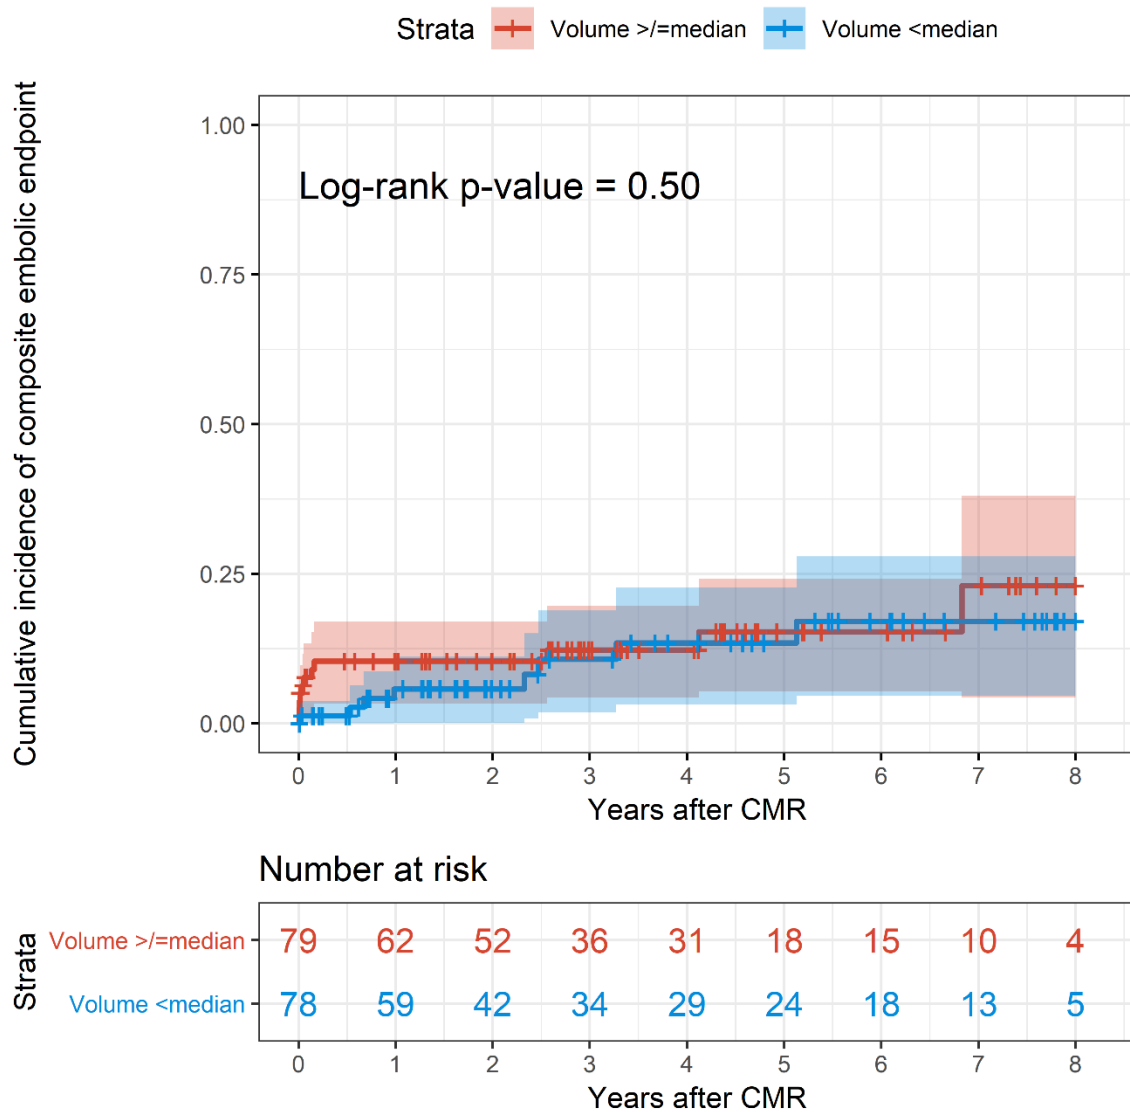

**Supplemental Figure 3. Incidence of embolism in patients with mobile LV thrombus compared with those with immobile LV thrombus.** Kaplan-Meier curves demonstrate the cumulative incidence of the composite embolic endpoint in patients with mobile LV thrombus (in red) and in patients with immobile LV thrombus (in blue). Note the lack of a significant difference in the cumulative incidence of embolic events between the two groups.

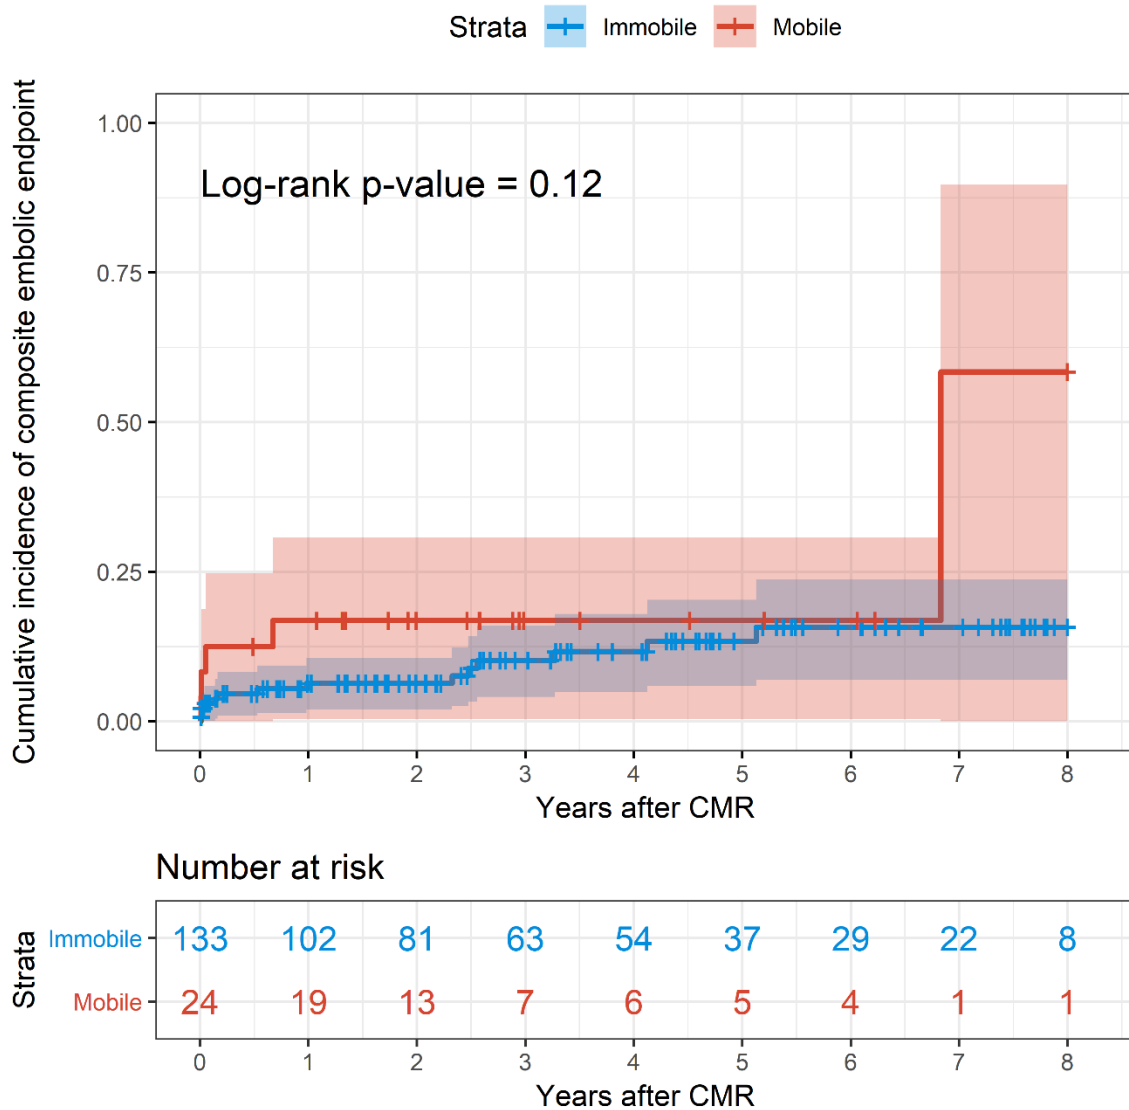

Supplement: NIHMS1064628-supplement-Supplemental_Material.pdf [file NIHMS1064628-supplement-Supplemental_Material.pdf]
